# Supplementary material
Source: PubMed Central journal article supplement (PMC7657103)
Supplement: CAS-104-1045-s001.pdf [file CAS-104-1045-s001.pdf]

## Supporting information

### Supplementary Figure S1

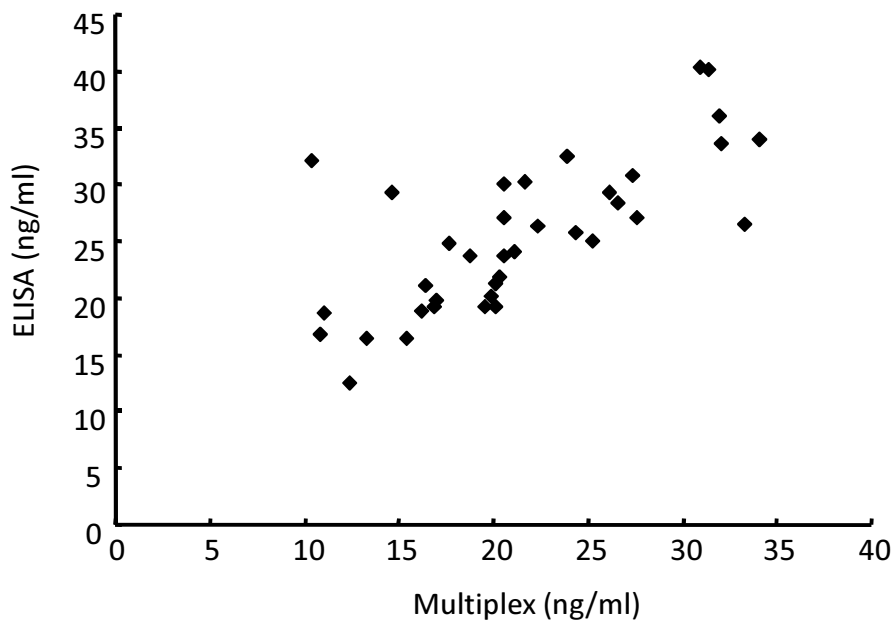

#### **Supplementary Figure S1: Comparison of the multiplex bead-based assay and ELISA.**

The sIL6R level of 37 patients in the CRT-discovery Cohort was determined by the multiplex bead-based assay (X-axis) and ELISA (Y-axis).

---

**Supplementary Table S1. Pathological criteria for evaluation of therapeutic efficacy.**

---

**Grade 0 Ineffective**

No recognizable cytological or histological therapeutic effect

**Grade 1 Slightly effective**

Apparently viable cancer cells (including cells having eosinophilic cytoplasm with vacuolation and swollen nuclei) account for 1/3 or more of tumor tissue, but there is some evidence of degeneration of cancer tissue or cells.

Grade 1a Viable cancer cells accounting for 2/3 or more of tumor tissue

Grade 1b Viable cancer cells accounting for 1/3 or more, but less than 2/3, of tumor tissue

**Grade 2 Moderately effective**

Viable cancer cells account for less than 1/3 of tumor tissue, while other cancer cells are severely degenerated or necrotic

**Grade 3 Markedly effective**

No viable cancer cells are evident

---

**Supplementary Table S2. List of 84 cytokines and related proteins analyzed by the Multiplexed immunobead-based assay.**

| <b>No.</b> | <b>Name</b>          | <b>Kit name</b>                               | <b>Manufacturer</b> |
|------------|----------------------|-----------------------------------------------|---------------------|
| 1          | Adiponectin          | Human Obesity MultiAnalyte Profiling Base Kit | R & D               |
| 2          | Adipsin              | Human Obesity MultiAnalyte Profiling Base Kit | R & D               |
| 3          | Beta 2-microglobulin | Acute Phase 4-Plex Panel                      | Invitrogen          |
| 4          | CRP                  | Acute Phase 4-Plex Panel                      | Invitrogen          |
| 5          | EGF                  | MAP Human Soluble Cytokine/Chemokine Panel    | Milliplex           |
| 6          | ENA78                | Cytokine Assay Human                          | Panomics            |
| 7          | Eotaxin              | Cytokine Assay Human                          | Panomics            |
| 8          | FGF-2                | MAP Human Soluble Cytokine/Chemokine Panel    | Milliplex           |
| 9          | FGF-basic            | Cytokine Assay Human                          | Panomics            |
| 10         | Flt-3 ligand         | MAP Human Soluble Cytokine/Chemokine Panel    | Milliplex           |
| 11         | Fractalkine          | MAP Human Soluble Cytokine/Chemokine Panel    | Milliplex           |
| 12         | Gc Globulin          | Acute Phase 4-Plex Panel                      | Invitrogen          |
| 13         | G-CSF                | Cytokine Assay Human                          | Panomics            |
| 14         | GM-CSF               | Cytokine Assay Human                          | Panomics            |
| 15         | GRO-alpha            | Cytokine Assay Human                          | Panomics            |
| 16         | Haptoglobin          | Acute Phase 4-Plex Panel                      | Invitrogen          |
| 17         | HGF                  | MAP Human Serum Adipokine Panel B             | Milliplex           |
| 18         | IFN-a2               | MAP Human Soluble Cytokine/Chemokine Panel    | Milliplex           |
| 19         | IFN-g                | Cytokine Assay Human                          | Panomics            |
| 20         | IL-10                | Cytokine Assay Human                          | Panomics            |
| 21         | IL-12p40             | Cytokine Assay Human                          | Panomics            |
| 22         | IL-12p40             | MAP Human Soluble Cytokine/Chemokine Panel    | Milliplex           |
| 23         | IL-12p70             | Cytokine Assay Human                          | Panomics            |
| 24         | IL-13                | Cytokine Assay Human                          | Panomics            |
| 25         | IL-15                | MAP Human Soluble Cytokine/Chemokine Panel    | Milliplex           |
| 26         | IL-17                | Cytokine Assay Human                          | Panomics            |
| 27         | IL-17                | MAP Human Soluble Cytokine/Chemokine Panel    | Milliplex           |
| 28         | IL-17F               | Cytokine Assay Human                          | Panomics            |
| 29         | IL-1alpha            | Cytokine Assay Human                          | Panomics            |
| 30         | IL-1beta             | Cytokine Assay Human                          | Panomics            |
| 31         | IL-1ra               | Cytokine Assay Human                          | Panomics            |
| 32         | IL-2                 | Cytokine Assay Human                          | Panomics            |
| 33         | IL-3                 | MAP Human Soluble Cytokine/Chemokine Panel    | Milliplex           |
| 34         | IL-4                 | Cytokine Assay Human                          | Panomics            |
| 35         | IL-5                 | Cytokine Assay Human                          | Panomics            |
| 36         | IL-6                 | MAP Human Soluble Cytokine/Chemokine Panel    | Milliplex           |
| 37         | IL-7                 | Cytokine Assay Human                          | Panomics            |
| 38         | IL-8                 | MAP Human Soluble Cytokine/Chemokine Panel    | Milliplex           |
| 39         | IL-9                 | MAP Human Soluble Cytokine/Chemokine Panel    | Milliplex           |
| 40         | Insulin              | MAP Human Serum Adipokine Panel B             | Milliplex           |
| 41         | IP-10                | Cytokine Assay Human                          | Panomics            |
| 42         | Leptin               | Cytokine Assay Human                          | Panomics            |
| 43         | MCP-1                | Cytokine Assay Human                          | Panomics            |
| 44         | MCP-3                | Cytokine Assay Human                          | Panomics            |
| 45         | MDC                  | MAP Human Soluble Cytokine/Chemokine Panel    | Milliplex           |
| 46         | MIG                  | Cytokine Assay Human                          | Panomics            |
| 47         | MIP-1a               | MAP Human Soluble Cytokine/Chemokine Panel    | Milliplex           |
| 48         | MIP-1b               | MAP Human Soluble Cytokine/Chemokine Panel    | Milliplex           |
| 49         | MMP-1                | Cytokine Assay Human                          | Panomics            |
| 50         | MMP-13               | Cytokine Assay Human                          | Panomics            |

|    |              |                                                         |            |
|----|--------------|---------------------------------------------------------|------------|
| 51 | MMP-2        | Cytokine Assay Human                                    | Panomics   |
| 52 | MMP-3        | Cytokine Assay Human                                    | Panomics   |
| 53 | MMP-9        | Cytokine Assay Human                                    | Panomics   |
| 54 | NGF          | Cytokine Assay Human                                    | Panomics   |
| 55 | PAI-1 active | MAP Human Serum Adipokine Panel A                       | Milliplex  |
| 56 | PAI-1 total  | Human Obesity MultiAnalyte Profiling Base Kit           | R&D        |
| 57 | PDGF-BB      | Cytokine Assay Human                                    | Panomics   |
| 58 | RANTES       | Cytokine Assay Human                                    | Panomics   |
| 59 | Resistin     | MAP Human Serum Adipokine Panel A                       | Milliplex  |
| 60 | SAA          | SAA Human Singleplex Bead Kit                           | Invitrogen |
| 61 | sCD30        | MAP Human Soluble Cytokine Receptor-Premixed 14-plex    | Milliplex  |
| 62 | sCD40L       | MAP Human Soluble Cytokine/Chemokine Panel              | Milliplex  |
| 63 | sEGFR        | MAP Human Soluble Cytokine Receptor-Premixed 14-plex    | Milliplex  |
| 64 | sE-selectin  | Human Adhesion Molecule MultiAnalyte Profiling Base Kit | R&D        |
| 65 | sgp130       | MAP Human Soluble Cytokine Receptor-Premixed 14-plex    | Milliplex  |
| 66 | sICAM-1      | Human Adhesion Molecule MultiAnalyte Profiling Base Kit | R&D        |
| 67 | sIL-1RI      | MAP Human Soluble Cytokine Receptor-Premixed 14-plex    | Milliplex  |
| 68 | sIL-1RII     | MAP Human Soluble Cytokine Receptor-Premixed 14-plex    | Milliplex  |
| 69 | sIL-2Ra      | MAP Human Soluble Cytokine Receptor-Premixed 14-plex    | Milliplex  |
| 70 | sIL-2Ra      | MAP Human Soluble Cytokine/Chemokine Panel              | Milliplex  |
| 71 | sIL-4R       | MAP Human Soluble Cytokine Receptor-Premixed 14-plex    | Milliplex  |
| 72 | sIL-6R       | MAP Human Soluble Cytokine Receptor-Premixed 14-plex    | Milliplex  |
| 73 | sP-Selectin  | Human Adhesion Molecule MultiAnalyte Profiling Base Kit | R&D        |
| 74 | sRAGE        | MAP Human Soluble Cytokine Receptor-Premixed 14-plex    | Milliplex  |
| 75 | sTNF-RI      | MAP Human Soluble Cytokine Receptor-Premixed 14-plex    | Milliplex  |
| 76 | sTNF-RII     | MAP Human Soluble Cytokine Receptor-Premixed 14-plex    | Milliplex  |
| 77 | sVCAM-1      | Human Adhesion Molecule MultiAnalyte Profiling Base Kit | R&D        |
| 78 | sVEGF-R1     | MAP Human Soluble Cytokine Receptor-Premixed 14-plex    | Milliplex  |
| 79 | sVEGF-R2     | MAP Human Soluble Cytokine Receptor-Premixed 14-plex    | Milliplex  |
| 80 | sVEGF-R3     | MAP Human Soluble Cytokine Receptor-Premixed 14-plex    | Milliplex  |
| 81 | TGF-a        | MAP Human Soluble Cytokine/Chemokine Panel              | Milliplex  |
| 82 | TNF-alpha    | Cytokine Assay Human                                    | Panomics   |
| 83 | TNF-beta     | Cytokine Assay Human                                    | Panomics   |
| 84 | VEGF         | Cytokine Assay Human                                    | Panomics   |

**Supplementary Table S3. correlation coefficient between 6 biomarkers**

|         | MMP3      | IFNA2     | Insulin   | MIP1A     | sIL6R     | MIP1B |
|---------|-----------|-----------|-----------|-----------|-----------|-------|
| MIP1B   | 0.269287  | 0.1641825 | 0.0673247 | 0.5742265 | 0.2140135 |       |
| sIL6R   | 0.3218302 | -0.068237 | 0.3459268 | 0.3489666 |           |       |
| MIP1A   | 0.2627102 | 0.5819163 | 0.080355  |           |           |       |
| Insulin | 0.063862  | -0.139248 |           |           |           |       |
| IFNA2   | 0.0040134 |           |           |           |           |       |
| MMP3    |           |           |           |           |           |       |

**Abbreviations:** MIP1B, macrophage inflammatory protein 1- $\beta$ ; soluble interleukin-6 receptor, sIL6R; MIP1A, macrophage inflammatory protein 1- $\alpha$ ; IFNA2, interferon  $\alpha$ 2; MMP3, matrix metalloproteinase 3.
